# Supplementary material
Source: PubMed Central journal article supplement (PMC6269203)
Supplement: NIHMS1509187-supplement-2.pdf [file NIHMS1509187-supplement-2.pdf]

## Hippocampal neural progenitor cells play a distinct role in fear memory retrieval in male and female CIE rats

McKenzie J. Fannon, Karthik K. Mysore, Jefferson Williams, Leon W. Quach, Dvijen C. Purohit, Britta D. Sibley, Janna S. Sage-Sepulveda, Khush M. Kharidia, Roberto J. Morales Silva, Michael J. Terranova, Sucharita S. Somkuwar, Miranda C. Staples, Chitra D. Mandyam

### Supplementary Figure 1

| Group                        | Males                                      | Females                                    |
|------------------------------|--------------------------------------------|--------------------------------------------|
| Experimentally naïve/Control | No CIE, no TFC                             | No CIE, no TFC                             |
| No CIE + TFC                 | TFC only                                   | TFC only                                   |
| CIE (72h AB)                 | CIE only followed by 72h abstinence        | CIE only followed by 72h abstinence        |
| CIE (96h AB)                 | CIE only followed by 96h abstinence        | CIE only followed by 96h abstinence        |
| CIE + TFC -Valcyte           | CIE followed by TFC at 72h without Valcyte | CIE followed by TFC at 72h without Valcyte |
| CIE + TFC +Valcyte           | CIE followed by TFC at 72h with Valcyte    | CIE followed by TFC at 72h with Valcyte    |

Table representation of the various groups used in the present study. CIE, chronic intermittent ethanol exposure; TFC, trace fear conditioning; AB, abstinence; h, hour.

## Supplementary Figure 2

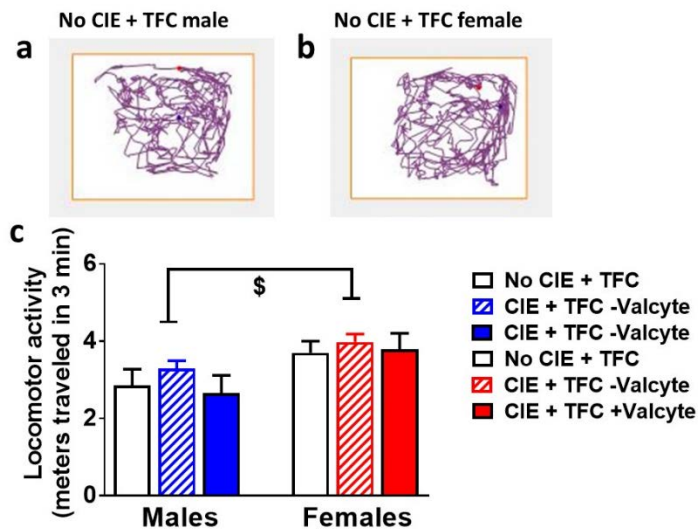

The video tracking algorithm in the ANYMaze system was utilized to determine the distance travelled in all rats (measured using the center of the animal as a reference point) prior to the first CS presentation. **(a-b)** Locomotion tracks of a representative male **(a)** and female **(b)** no CIE + TFC rat during habituation. **(c)** Quantitative data of locomotor activity. Two-way ANOVA did not show a sex x treatment interaction ( $F[2,72]=0.2$ ,  $p = 0.8$ ), or main effect of treatment ( $F[2,72]=0.8$ ,  $p = 0.4$ ), however, detected a significant main effect of sex ( $F[1,72]=9.5$ ,  $^{\$}p = 0.002$ ).  $n = 16$  no CIE males,  $n = 11$  Valcyte- CIE males,  $n = 14$  Valcyte+ CIE males;  $n = 13$  no CIE females,  $n = 15$  Valcyte- CIE females,  $n = 10$  Valcyte+ CIE females. Data is expressed as Mean  $\pm$  S.E.M.
